# Supplementary material for: PM2b, a CC-NBS-LRR protein, interacts with TaWRKY76-D to regulate powdery mildew resistance in common wheat
Source: Front Plant Sci. 2022 Oct 26;13:973065. doi: 10.3389/fpls.2022.973065 (PMC9644048; doi:10.3389/fpls.2022.973065)
Supplement: Supplementary file 3 [file DataSheet_1.xlsx]

## Sheet: Table S1
Table S1. Primer sequences in this study
primer	Forward Sequence (5'-3')	Reverse Sequence (5'-3')	Function
CFD81	TATCCCCAATCCCCTCTTTC	GTCAATTGTGGCTTGTCCCT	Mapping
BWM20	GCTTCATCCTCAGCTTCGTC	GGAGGAAACAAAGGCACAGA
BWM25	ACGAACCCCACCCTCATTA	ATCACGCCCCATTTTTCTC
SCAR112	GAATTCACTGAGCAGAAGATC	TTAACAGTGACCCGGTTATGC
Pm2b-map-1	AAAACCCAACGACACCAACG	ACGCCGGTTTAGATTAGTGCA
Pm2b-map-2	gaaggtgaccaagttcatgctGAGAACAAGTTCTGCGGTGG	TAGATAAGCTAAAGGAAACAAGAAT
	gaaggtcggagtcaacggattGAGAACAAGTTCTGCGGTGT
Pm2b-map-3	TGGTAACGAAGGTTGTCGCC	GCTCAATCTGAGAACCTT
K529	gaaggtgaccaagttcatgctGCTCATGGACAATGATCGCC	CTCCTTTTCTCGTCCAAC	Specific marker
	gaaggtcggagtcaacggattGCTCATGGACAATGATCGCA
Pm2b-VIGS	CTTGAATTCCTTCTGCCTCCAAGCCTAAT	CTTGTCGACGATGCGGACTCCAGATGTTT	BSMV-VIGS vector construction of Pm2b
Pm2b-qPCR	AATGATCGCCAGACTAGTTCAAC	AATGCTTTACTACCTCATCTTGACC	qRT-PCR
TaActin	AGGTGCCCTGAGGTGCTGTT	GCCAAAATAGAGCCACCGAT
Pm2b-genome-1	TTTTCGCGGTATTGCTGGTG	ACCCTCCTGTCATCGGTTCAC	Gene cloning
Pm2b-genome-2	CCCTCCTCCTTGAAGAATCTGA	GCACAAACTCTACCCTGTTCC
Pm2b-Subcelluar-R	AGGACAGCCCAAGCTATGGCTGCCTCTGCCGCA	TGCTCACCATGGATCGTGCAACGACGACTCGGACA	Subcellular localization of Pm2b
pGBKT7-CC	CATGGAGGCCGAATTCATGGCTGCCTCTGCCGCAC	GCCGCTGCAGGTCGACCTATCCAACAAAATTGGTTGCACTTGAT	Yeast two-hybrid assay vectors construction
pGBKT7-NB	CATGGAGGCCGAATTCATGCGAGAAAAGGAGAAAGAACAGA	GCCGCTGCAGGTCGACCTAATTCTTAAAATGGGAGATTTTCTTG
pGBKT7-LRR	CATGGAGGCCGAATTCATGCTGCGCACTATTATCATTGATT	GCCGCTGCAGGTCGACCTAGTGCAACGACGACTCGGAC
pGBKT7-Pm2b-S	CATGGAGGCCGAATTCATGGCTGCCTCTGCCGCA	GCCGCTGCAGGTCGACCTATAGCAAATGCTCGGCGACA
pGADT7-CC	GGAGGCCAGTGAATTCATGGCTGCCTCTGCCGCAC	CGAGCTCGATGGATCCTCATCCAACAAAATTGGTTGCACTTGAT
pGADT7-NB	GGAGGCCAGTGAATTCATGCGAGAAAAGGAGAAAGAACAGA	CGAGCTCGATGGATCCTCAATTCTTAAAATGGGAGATTTTCTTG
pGADT7-LRR	GGAGGCCAGTGAATTCATGCTGCGCACTATTATCATTGATT	CGAGCTCGATGGATCCCTAGTGCAACGACGACTCGGAC
pGADT7-LRR-Pm2b-S	GGAGGCCAGTGAATTCATGGCTGCCTCTGCCGCA	CGAGCTCGATGGATCCCTATAGCAAATGCTCGGCGACA
pGADT7-TaWRKY76	GGAGGCCAGTGAATTCATGTGTTGCTTCTGGACCATGGGCA	CGAGCTCGATGGATCCCTAATAATCCGGCAGCTTCCGCAAG
pGADT7-TaWRKY761-80	GGAGGCCAGTGAATTCATGTGTTGCTTCTGGACCATGGGCA	CGAGCTCGATGGATCCTTACAGGTAGGCGATCATTTCAGTCAGC
pGADT7-TaWRKY7681-330	GGAGGCCAGTGAATTCATGTACGGCAACCAGGTCTCGCGC	CGAGCTCGATGGATCCCTAATAATCCGGCAGCTTCCGCAAG
Nluc-CC	CACGGGGGACGAGCTCGGTACCATGGCTGCCTCTGCCGCACT	ACGCGTACGAGATCTGGTCGACTCCAACAAAATTGGTTGCACTTGAT	Luciferase complementation imaging assay vectors construction
Nluc-NB	CACGGGGGACGAGCTCGGTACCATGCGAGAAAAGGAGAAAGAACAGA	ACGCGTACGAGATCTGGTCGACATTCTTAAAATGGGAGATTTTCTTG
Nluc-LRR	CACGGGGGACGAGCTCGGTACCATGCTGCGCACTATTATCATTGATT	ACGCGTACGAGATCTGGTCGACGTGCAACGACGACTCGGACATA
Nluc-Pm2b-S	CACGGGGGACGAGCTCGGTACCATGGCTGCCTCTGCCGCA	ACGCGTACGAGATCTGGTCGACTAGCAAATGCTCGGCGACA
Nluc-TaWRKY76	CACGGGGGACGAGCTCGGTACCATGTGTTGCTTCTGGACCATGGGCA	ACGCGTACGAGATCTGGTCGACATAATCCGGCAGCTTCCGCAAG
Nluc-TaWRKY761-80	CACGGGGGACGAGCTCGGTACCATGTGTTGCTTCTGGACCATGGGCA	ACGCGTACGAGATCTGGTCGACGTAGGCGATCATTTCAGTCAGC
Nluc-TaWRKY7681-330	CACGGGGGACGAGCTCGGTACCATGTACGGCAACCAGGTCTCGCGC	ACGCGTACGAGATCTGGTCGACATAATCCGGCAGCTTCCGCAAG
Cluc-CC	TACGCGTCCCGGGGCGGTACCATGGCTGCCTCTGCCGCACT	TCCTTGTAGTCCATTTGTTGTCATCCAACAAAATTGGTTGCACTTGAT
Cluc-NB	TACGCGTCCCGGGGCGGTACCATGCGAGAAAAGGAGAAAGAACAGA	TCCTTGTAGTCCATTTGTTGTCAATTCTTAAAATGGGAGATTTTCTTG
Cluc-LRR	TACGCGTCCCGGGGCGGTACCATGCTGCGCACTATTATCATTGATT	TCCTTGTAGTCCATTTGTTGCTAGTGCAACGACGACTCGGACATA
Cluc-Pm2b-S	TACGCGTCCCGGGGCGGTACCATGGCTGCCTCTGCCGCA	TCCTTGTAGTCCATTTGTTGTCATAGCAAATGCTCGGCGACA
Cluc-TaWRKY76	TACGCGTCCCGGGGCGGTACCATGTGTTGCTTCTGGACCATGGGCA	TCCTTGTAGTCCATTTGTTGTCAATAATCCGGCAGCTTCCGCAAG
TaWRKY76-qrtPCR	ACCAACGACGAGGCTAAGA	TCCACATCGCAAGAATGC	qRT-PCR
TaWRKY76-VIGS	CGGCGAGCTGCCGAGCTACG	TAAACTTTTGGTCGCCGGTGAG	BSMV-VIGS vector construction of TaWRKY76
TaWRKY76-Subcelluar-R	AGGACAGCCCAAGCTTATGTGTTGCTTCTGGACCATGGGCA	CCATGGATCCGTCGACATAATCCGGCAGCTTCCGCAAG	Subcellular localization of TaWRKY76

## Sheet: Table S2
Table S2. Sequence variations of wheat powdery mildew resistance gene Pm2b in resistant material KM2939 and susceptible material Shimai 15
Position	Pm2b	Pm2-SM15
15	C	T
171-173	CGA	-
556	C	A
572	C	T
609	A	C
624	G	A
750	T	G
837	G	C
850	C	G
892	G	A
1131-1132	CA	TG
1260-1261	CC	TT
1265	AAAGCAA	-
1295	A	G
1411	T	C
1456	C	A
1521	G	A
1581	T	A
1709	C	T
1866	CTC	-
1883	A	G
1885	A	G
1917	A	G
3033	T	C
3043	G	T
3054	A	G
3082	C	T
3088	G	A
3129	C	G
3135	G	A
3173	A	G
3237	G	C
3252	G	T
3257	G	A
3266	C	T
3349	G	T
3356-3357	GC	TA
3360	A	T
3390	T	G
3415	T	A
3418	T	G
3434	G	A
3439	G	C
3445	A	G
3461	G	A
3493	C	T
3506	T	A
3635	A	G
3641	C	G
3704	T	C
3851	T	C
3901	T	C
3907	T	C
3920	T	A
3926-3927	AG	GT
3962	G	-
4181	-	T
4242	C	T

## Sheet: Table S3
Table S3. Interacting proteins of PM2b by yeast two-hybrid
Group	Number of positive clones	Protein	Function
Group 1	8	TraesCS4A02G161200LC.1	putative zinc finger protein CONSTANS-LIKE 11
Group 2	6	TraesCS2B02G250500.2	protein C2-DOMAIN ABA-RELATED 8-like
Group 3	3	TraesCS5A02G409000.1	protein AE7-like 1
Group 4	3	TraesCS4A02G423800.1	histone H3
Group 5	2	TraesCS7A02G462400.1	KNR4/SMI1 homolog
Group 6	2	TraesCS5B02G189000.1	mitochondrial outer membrane porin
Group 7	6	TraesCS5B02G224000.1	Triticum aestivum WRKY transcription factor WRKY76-like

## Sheet: Table S4
Table S4. The sequence variations of 22 wheat cultivars/lines
No.	genes	Cultivars/lines	Haplotypes	References
	Pm2b	KM2939	Pm2b
	Pm2-SM15	Shimai 15	Pm2-SM15
1	MlBrock	Brock	Pm2b	Li et al., 2009
2	PmD57-5D	D57-5D	Pm2b	Ma et al., 2011
3	PmLX66	Liangxing 66	Pm2b	Huang et al., 2012
4	MlND399	Nongda 399	Pm2b	Liu et al., 2013
5	PmX3986-2	X3986-2	Pm2b	Ma et al., 2014
6	PmW14	Wennong 14	Pm2b	Song et al., 2014
7	PmPB3558	Pubing 3558	Pm2b	Lu et al., 2014
8	PmWFJ34	Wanfengjian 34	Pm2b	Ma et al., 2015
9	PmZ155	Zhongmai 155	Pm2b	Sun et al., 2015
10	Pm2c	Niaomai	Pm2b	Xu et al., 2015
11	PmYB	Yingbo 700	Pm2b	Ma et al., 2015
12	PmPB74	Pubing 74	Pm2b	Lu et al., 2016
13	PmFG	Faguo-1	Pm2b	Ma et al., 2016
14	Pm10V-2	10V-2	Pm2b	Ma et al., 2018
15	PmSub	Subtil	Pm2b	Jin et al., 2018
16	-	Shixin 633	Pm2-SM15
17	-	Shixin 733	Pm2-SM15
18	-	Shixin 828	Pm2-SM15
19	-	Shi 4185	Pm2-SM15
20	-	Jishi 02-1	Pm2-SM15
21	-	Gao 8901	Pm2-SM15
22	-	Chinese spring	Pm2-SM15

## Sheet: Table S5
Table S5. The results of marker K529 amplicons in 133 wheat cultivars/ lines
No.	Cultivars/Lines	K529	No.	Cultivars/Lines	K529	No.	Cultivars/Lines	K529
1	Abbondanza	0	47	Lumai 1	0	93	Xiaoyan 168	0
2	Aifeng 3	0	48	Lumai 14	0	94	Xiaoyan 22	0
3	Aikang 58	0	49	Lumia 21	0	95	Xiaoyan 6	0
4	Aimengniu	0	50	Luomai 21	0	96	Xiaoyan 81	0
5	ALSON	1	51	Luyuan 502	0	97	Xiaoyan 926	0
6	Auro	0	52	Market	1	98	Xiaoyan 96	0
7	Baichun 5	0	53	MEX94.7.43	1	99	Xingnong 9	1
8	Bainong 3217	0	54	Mianmai 40	1	100	Xingyi 4	1
9	Beijing 8	0	55	Mianmai 48	1	101	Xinong 2611	0
10	Bima 1	0	56	Moba 66	0	102	Xinong 6028	0
11	Bima 4	0	57	Nanda2419	0	103	Xinong 8727	0
12	Boai 7023	0	58	Niaomai	1	104	Xinong 881	0
13	Brock	1	59	Nongda 1108	1	105	Xinong 889	0
14	Changwu 131	0	60	Nongda 1193	0	106	Xuzhou 438	0
15	Chengduguangtou	0	61	Nongda 179	0	107	Yanda 1817	0
16	Chuanmai 42	0	62	Nongda 340	0	108	Yang 9290	0
17	D57-5D	1	63	Nongda195	0	109	Yangmai 12	1
18	Faguo-1	1	64	PH82-2-2	0	110	Yangmai 13	1
19	Fan 6	0	65	Qianhuan 2	0	111	Yangmai 158	0
20	Fengchan 3	0	66	Qinmai 11	0	112	Yannong 19	0
21	Fr 81-6	1	67	Shan 150	0	113	Yingbo 700	1
22	Funo	0	68	Shan 160	0	114	Youzimai	0
23	Gao 8901	0	69	Shan 229	0	115	Yuanfeng 175	0
24	Gaoyou 503	0	70	Shan 253	0	116	Yumai 13	0
25	Han 6172	0	71	Shan354	0	117	Yumai 18	0
26	Han 7086	0	72	Shannong 17	0	118	Yumai 2	0
27	Heng 4444	0	73	Shannong 21	0	119	Yumai 34	0
28	Henong 827	0	74	Shannong 28	0	120	Zaoyangmai	0
29	Huangxiandaliban	0	75	Shanyou 225	0	121	ZG 6631/76	1
30	Hussar	1	76	Shi 4185	0	122	Zhengmai 366	0
31	Ji 5265	0	77	Shijiazhuang 54	0	123	Zhengmai9023	0
32	Jiangdongmen	0	78	Shimai 15	0	124	Zhengmaiyu 9989	0
33	Jimai 19	0	79	Shimai 18	1	125	Zhengnong 16	0
34	Jimai 22	1	80	Shixing 633	0	126	Zhengyin 4	0
35	Jimai 84-5103	0	81	Shixing 733	0	127	Zhongmai 155	1
36	Jinan 2	0	82	Shixing 828	0	128	Zhou 16	0
37	Jinmai 41	0	83	Shiyou 17	0	129	Zhou 18	0
38	Jishi 02-1	0	84	Subtil	1	130	Zhou 8425B	0
39	Kenong 199	0	85	Tainong 19	0	131	Zhou 9823	0
40	Kenong 213	0	86	Taishan 1	0	132	Zhoumai 19	0
41	Kenong 9024	0	87	Ulka	1	133	Zhouyuan 9369	0
42	Liangxing 66	1	88	Wanfengjian 34	1
43	Liangxing 99	1	89	Weimai 4	0
44	Ligao 6	0	90	Wennong 14	1
45	Linyou 145	0	91	Wuyimai	0
46	Loverin 10	0	92	X3986-2	1
